# Supplementary material
Source: Springer Nature journal article supplement (https://www.springermedizin.de/resource/supplementary/12889_2008_1351_MOESM4_ESM.pdf/9503014)
Supplement: MOESM4 [file 9503014]

Map of Sabongidda - Ora

FIGURE 2. MAP OF SABONGIDDA-ORA, OWAN-WEST LOCAL GOVERNMENT AREA, EDO STATE, NIGERIA

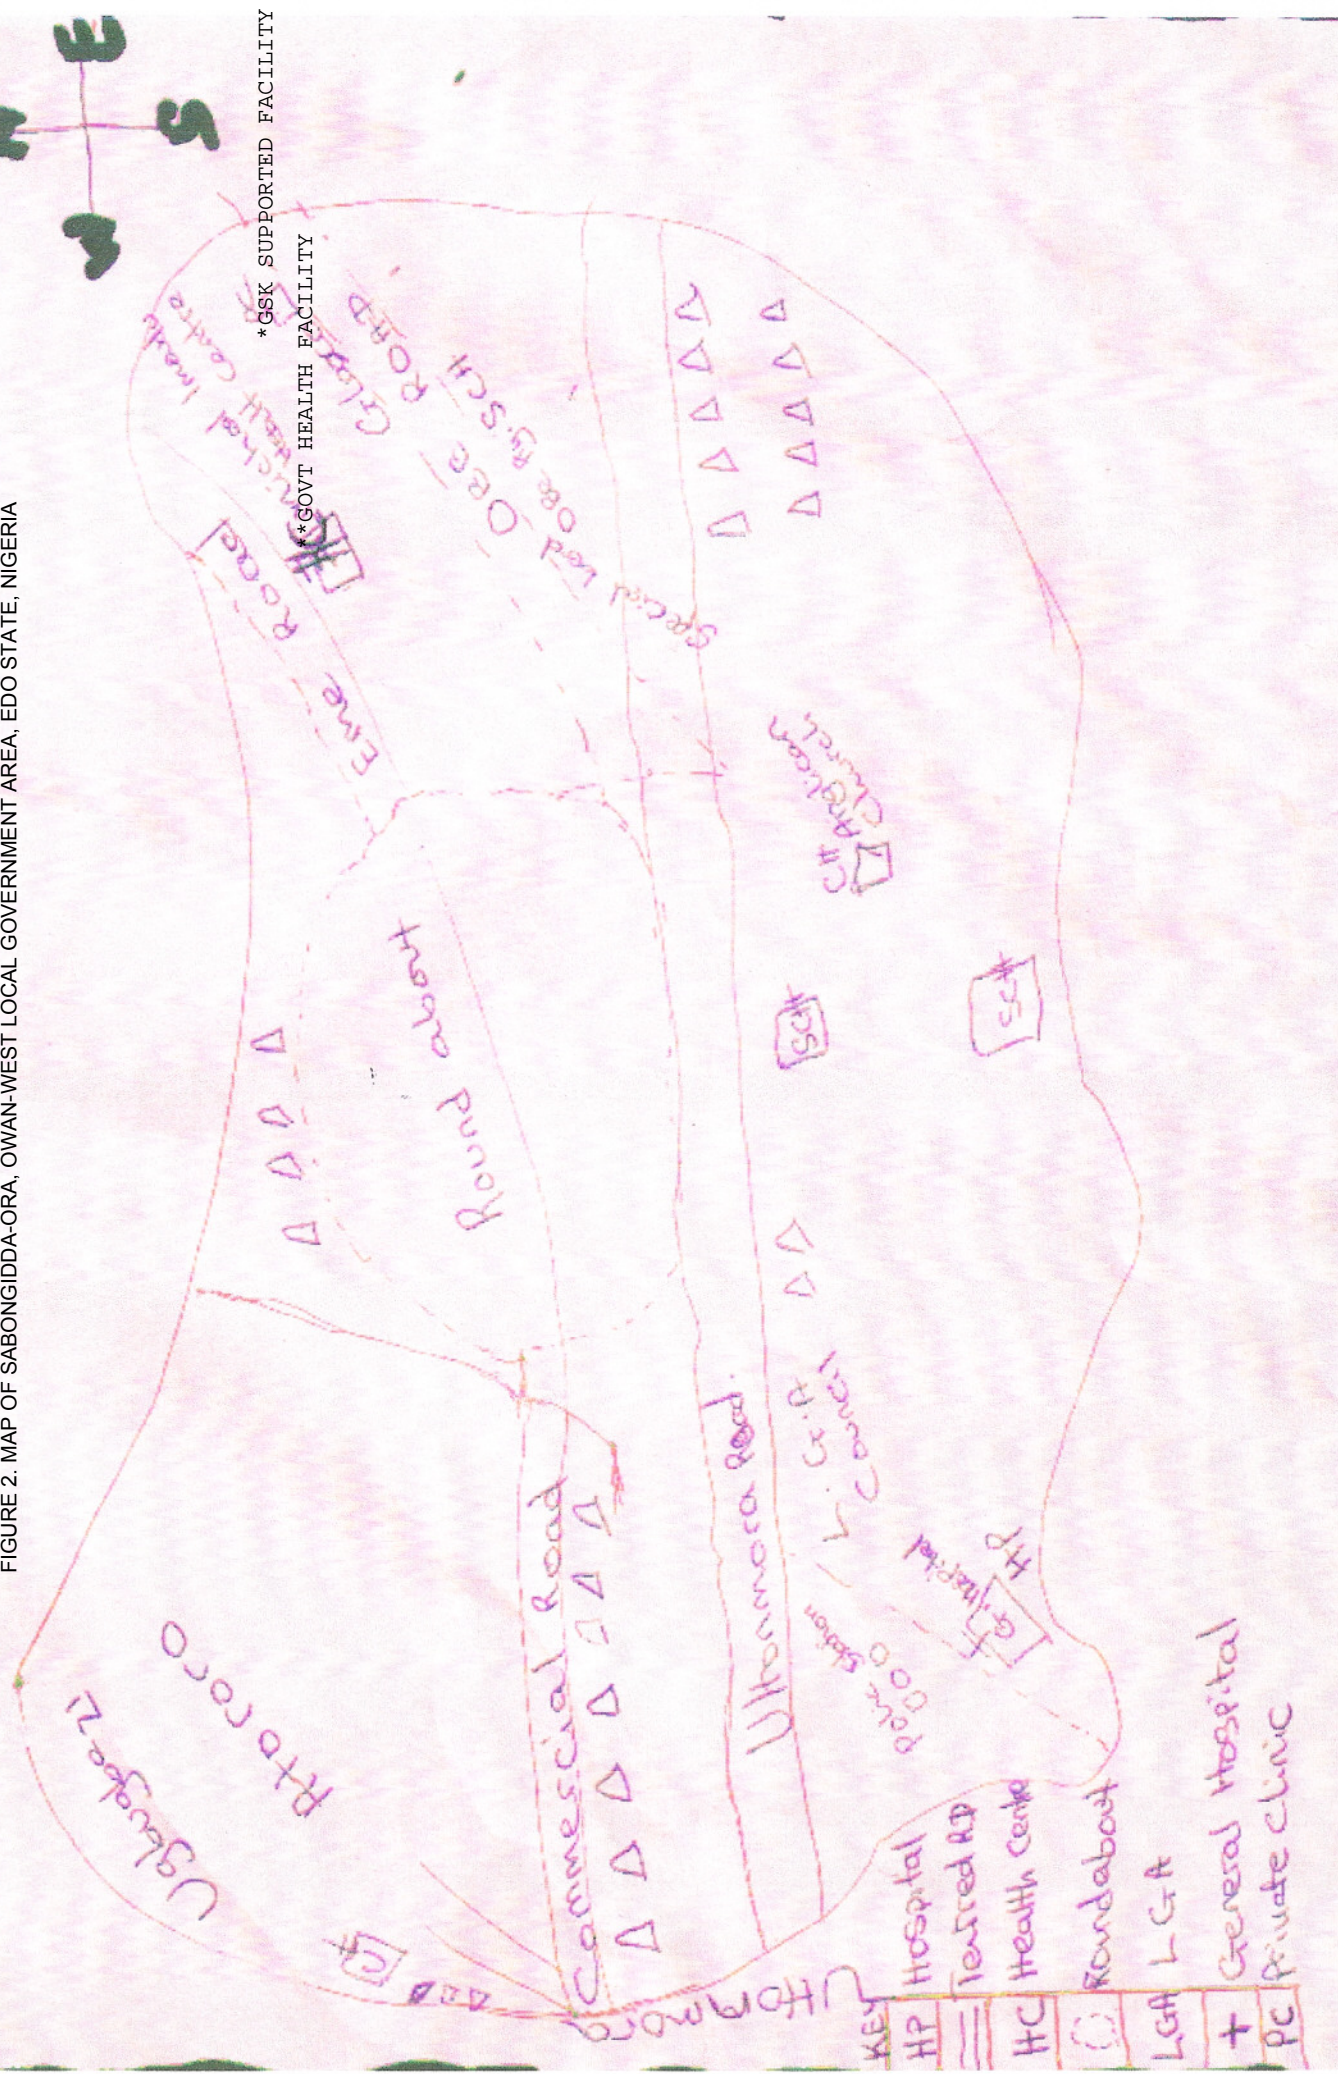

\*CSK SUPPORTED FACILITY

\*GOVT HEALTH FACILITY

- KEY
- HP Hospital
- Tented AP
- HC Health Centre
- Rondabout
- LGA LGA
- + General Hospital
- PC Private Clinic
